# Supplementary material for: Relationship Between Diet Quality and Statin Use Among Adults With Metabolic Syndrome From the CARTaGENE Cohort
Source: PubMed Central journal article supplement (PMC10837700; doi:10.1016/j.cjco.2023.09.014), 2023-09-29
Supplement: mmc1.pdf [file mmc1.pdf]

## **Supplemental material**

### **Relationship Between Diet Quality and Statin Use Among Adults With Metabolic**

### **Syndrome From the CARTaGENE Cohort**

Amélie Bélanger, Clémence Desjardins, Lise Leblay, Mathieu Filiatrault, Olivier Barbier, Anne

Gangloff, Jacinthe Leclerc, Jean Lefebvre, Arsène Zongo, Jean-Philippe Drouin-Chartier

#### **Corresponding author:**

Jean-Philippe Drouin-Chartier

[jean-philippe.drouin-chartier@pha.ulaval.ca](mailto:jean-philippe.drouin-chartier@pha.ulaval.ca)

**Supplemental Table S1: Variables for which missing values were imputed.**

| <b>Variables</b>                                | <b>Imputed value</b> | <b>Imputations, n (%)</b> |
|-------------------------------------------------|----------------------|---------------------------|
| Annual household income, \$                     | 50,000\$ to 74,999\$ | 123 (5.0)                 |
| Body mass index, kg/m <sup>2</sup>              | 28.5                 | 8 (0.3)                   |
| Education level                                 | Technical school     | 13 (0.5)                  |
| HbA1c, %                                        | 5.60                 | 18 (0.7)                  |
| IPAQ Physical activity level                    | Moderate             | 112 (4.5)                 |
| Plasma glucose, mmol/L                          | 5.70                 | 61 (2.5)                  |
| Self-reported history of high blood cholesterol | No                   | 44 (1.8)                  |
| Self-reported history of high blood pressure    | No                   | 19 (0.8)                  |
| Smoking status                                  | Never smoker         | 11 (0.4)                  |
| Waist circumference, cm                         | 98.0                 | 30 (1.2)                  |

**Supplemental Table S2: Alternate healthy eating index according to statin use and Canadian Cardiovascular Society criteria for statin indication.**

| <b>Diet quality</b>  | <b>Participants not using statin and not meeting CCS statin indication criteria<br/>(n=501)</b> | <b>Participants not using statin and meeting CCS statin indication criteria<br/>(n=1,517)</b> | <b>Participants using statin<br/>(n=463)</b> | <b>P value (between groups)</b> |
|----------------------|-------------------------------------------------------------------------------------------------|-----------------------------------------------------------------------------------------------|----------------------------------------------|---------------------------------|
| AHEI total score (%) | 41.4 (40.2, 42.6)                                                                               | 41.1 (40.3, 42.0)                                                                             | 40.0 (38.9, 41.2)                            | 0.09                            |

Statin indication was defined as: 1- Framingham risk score  $\geq 20\%$ ; or 2- Framingham risk score between 10 and 19% with a) LDL-C  $\geq 3.50$  mmol/L, or b) non-HDL-C  $\geq 4.3$  mmol/L, or c) age  $\geq 50$  years for men and  $\geq 60$  years for women. Criteria 2c needs concomitant presence of low HDL-C, high plasma glucose, high waist circumference, active smoking or hypertension. As all included participants had metabolic syndrome, these concomitant conditions are met;

Data are presented as adjusted mean (95% confidence interval). Multiple linear regression models were used (GLM procedure) with adjustments for gender, age, annual household income, smoking status, physical activity level, self-reported history of high blood pressure, body mass index, energy intake, and alcohol consumption;

Tukey-Kramer between groups *P* values:

Participants not using statin and not meeting CCS statin indication criteria vs participants not using statin and meeting CCS statin indication criteria, *P*=0.83;

Participants not using statin and not meeting CCS statin indication criteria vs participants using statin, *P*=0.13;

Participants not using statin and meeting CCS statin indication criteria vs participants using statin, *P*=0.11.

**Supplemental Table S3: Relationship between the Alternative healthy eating index (AHEI) and concentrations of plasma lipids, according to statin use.**

| Plasma lipids                | Participants not using statin<br>(n=2,018)          |                | Participants using statin<br>(n=463)                |                | <i>P</i> value<br>(interaction) |
|------------------------------|-----------------------------------------------------|----------------|-----------------------------------------------------|----------------|---------------------------------|
|                              | $\beta$ (95% CI) per 10-point increment in the AHEI | <i>P</i> value | $\beta$ (95% CI) per 10-point increment in the AHEI | <i>P</i> value |                                 |
| Total-cholesterol (mmol/L)   | 0.04 (0.00, 0.08)                                   | 0.05           | -0.03 (-0.12, 0.05)                                 | 0.43           | 0.12                            |
| LDL-cholesterol (mmol/L)     | 0.05 (0.01, 0.08)                                   | 0.01           | 0.02 (-0.05, 0.10)                                  | 0.53           | 0.58                            |
| HDL-cholesterol (mmol/L)     | 0.00 (-0.01, 0.01)                                  | 0.96           | 0.01 (-0.01, 0.04)                                  | 0.22           | 0.26                            |
| Non-HDL-cholesterol (mmol/L) | 0.04 (0.00, 0.08)                                   | 0.04           | -0.05 (-0.13, 0.03)                                 | 0.24           | 0.05                            |
| Triglycerides (mmol/L)       | -0.01 (-0.05, 0.03)                                 | 0.51           | -0.15 (-0.23, -0.07)                                | 0.0001         | 0.001                           |

Data are presented as mean (95% confidence interval). Linear regression models were used (GLM procedure) with adjustments for sex, age, annual household income, smoking status, physical activity level, self-reported history of high blood pressure, body mass index, energy intake, statin use, and alcohol consumption.

**Supplemental Table S4: Odds ratios (95% confidence interval) of plasma cholesterol concentrations below the Canadian Cardiovascular Society targets for primary prevention of CVD associated with statin use and the Alternative healthy eating index (AHEI).**

| <b>Target</b>                         | <b>Exposure</b>                | <b>Odds ratio (95% CI)</b> | <b>P value</b> |
|---------------------------------------|--------------------------------|----------------------------|----------------|
| LDL-C<2.00 mmol/L<br>(n=205/2,481)    | Statin use (yes vs no)         | 7.90 (5.68, 11.0)          | <0.0001        |
|                                       | AHEI (per 10-points increment) | 0.87 (0.75, 1.01)          | 0.07           |
| Non-HDL-C<2.60 mmol/L<br>(n=96/2,481) | Statin use (yes vs no)         | 6.04 (3.81, 9.57)          | <0.0001        |
|                                       | AHEI (per 10-points increment) | 0.98 (0.79, 1.21)          | 0.83           |

Data are presented as adjusted odds ratios (95% confidence interval). Logistic regression models were used (LOGISTIC procedure) with adjustments for sex, age, annual household income, smoking status, physical activity level, self-reported history of high blood pressure, body mass index, energy intake, and alcohol consumption.

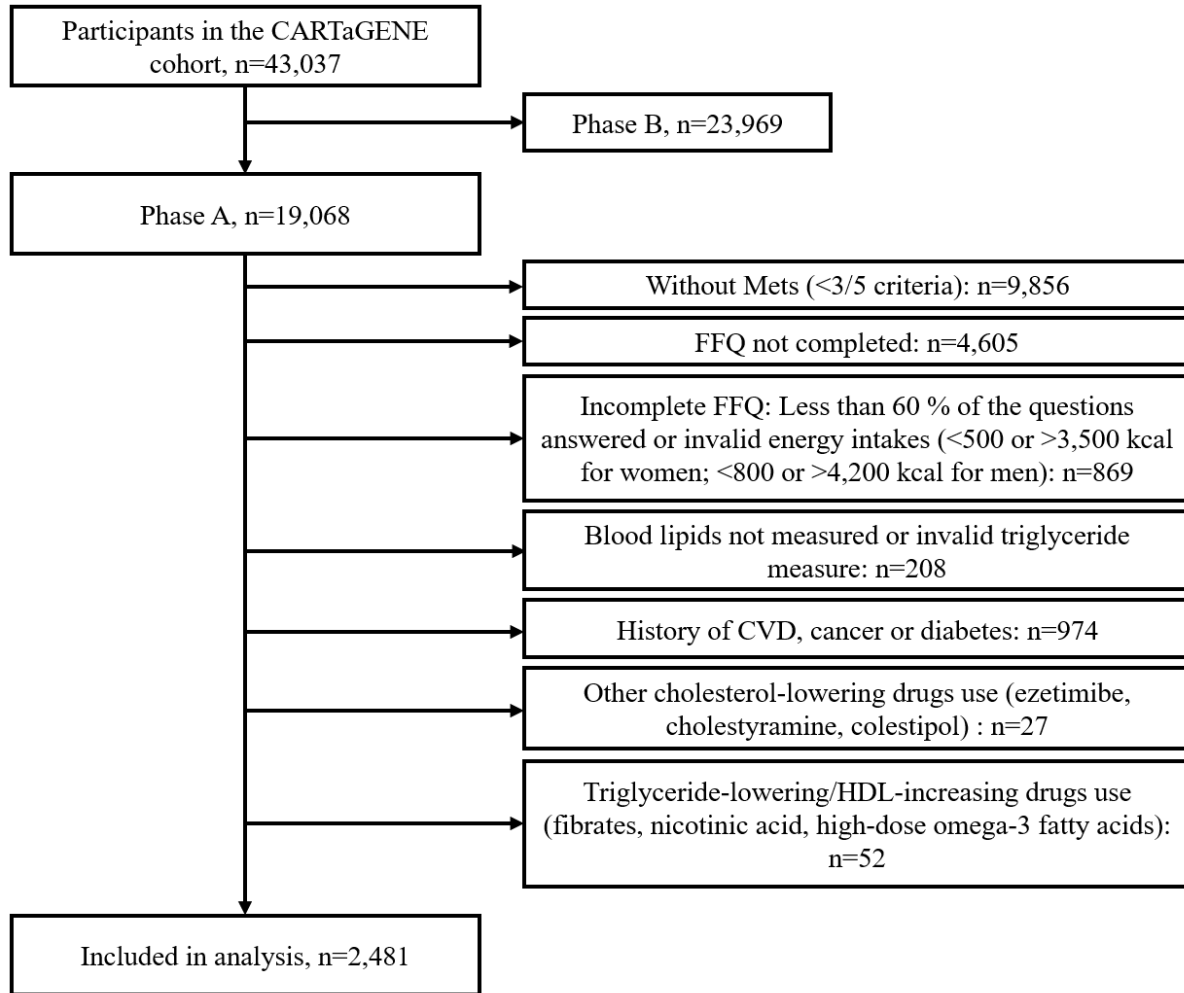

**Supplemental Figure S1: Flow chart of participants selection.**
